# Supplementary material for: Unprecedented carbon–carbon bond cleavage in nucleophilic aziridine ring opening reaction, efficient ring transformation of aziridines to imidazolidin-4-ones
Source: Royal Society of Chemistry journal article supplement (doi:10.1039/b816007d), 2008-11-18
Supplement: b816007d.pdf [file b816007d.pdf]

## Electronic Supplementary Information

# Unprecedented Carbon-Carbon Bond Cleavage in Nucleophilic Aziridine Ring Opening Reaction, Efficient Ring Transformation of Aziridines to Imidazolidin-4-ones

*Jin-Yuan Wang, Yuan Hu, De-Xian Wang, Jie Pan, Zhi-Tang Huang, and Mei-Xiang Wang\**

Beijing National Laboratory for Molecular Sciences, Laboratory of Chemical Biology,  
Institute of Chemistry, Chinese Academy of Sciences, Beijing 100080, China

[mxwang@iccas.ac.cn](mailto:mxwang@iccas.ac.cn)

### Table of Contents

|                                                                                    |      |
|------------------------------------------------------------------------------------|------|
| 1. General experimental methods and spectroscopic data of compounds prepared ..... | ESI1 |
| 2. References.....                                                                 | ESI5 |

#### 1. General experimental methods and spectroscopic data of compounds prepared.

Both melting points and boiling points are uncorrected. Starting materials **1**,<sup>1-3</sup> **2**,<sup>4</sup> **5**,<sup>4</sup> and **7**<sup>1-3</sup> were prepared according to the literature methods.

##### 1.1 General procedure for the cross-coupling reaction of trans- and cis-3-aryl-1-methylaziridine-2-carboxamides **1** and **7** with 1-aryl-2-bromoethenes **2** and **5**.

Under argon protection, a mixture of trans- or cis-3-aryl-1-methylaziridine-2-carboxamides **1** or **7** (1 mmol), *N,N*-dimethylglycine (112 mg, 0.8 mmol), Cs<sub>2</sub>CO<sub>3</sub> (652 mg, 2 mmol), CuI (76 mg, 0.4 mmol) and 1-aryl-2-bromoethenes **2** or **5** (3 mmol) in dry 1,4-dioxane (40 mL) was refluxed for a period of time (Table 1 and Scheme2 3-5). After completion of the reaction, which was

monitored by TLC, the mixture was filtrated through a pad silica gel (100-200 mesh). The filtrate was concentrated under vacuum, the resulting residue was chromatographed on a silica gel column using a mixture of petroleum ether and ethyl acetate (1:5) to give pure products **3**, **4**, **6**, **8** and **9** (Table 1 and Schemes 3-5).

### 1.2 Conversion of *N*-styryl-3-phenyl-1-methylaziridine-2-carboxamides **3** and **9** into the corresponding imidazolidin-4-one products **4a** and **6a**.

Under argon protection, a mixture of *N*-styryl-3-phenyl-1-methylaziridine-2-carboxamide **3** (0.5 mmol) and Cs<sub>2</sub>CO<sub>3</sub> (2 mmol) in dry 1,4-dioxane (10 mL) was refluxed 12 h, while in the case of **9**, a mixture of **9** (0.5 mmol) and NaH (2 mmol) in dry DMF was stirred at 70 °C. After completion of the reaction, which was monitored by TLC, water was added and resulting mixture was extracted with ethyl acetate (20 mL×3). The organic layer was dried over with anhydrous Na<sub>2</sub>SO<sub>4</sub>, concentrated under vacuum to give a residue. Column chromatography on a silica gel column using a mixture of petroleum ether and ethyl acetate (1:5) to give pure products **4a** or **6a**.

### 1.3 Characterization of the products prepared.

***N*-(*Z*-Phenylvinyl)-*trans*-1-methyl-3-phenylaziridine-2-carboxamide **3****: oil; <sup>1</sup>H NMR (300 MHz, CDCl<sub>3</sub> TMS) δ 9.07 (d, 1H, *J* = 10.8 Hz), 6.88-7.44 (m, 11H), 5.75 (d, 1H, *J* = 9.6 Hz), 3.29 (s, 1H), 2.69 (s, 1H), 2.15 (s, 3H); IR (KBr) ν 3335 (N-H), 1687 (C=O), 1654 cm<sup>-1</sup>; <sup>13</sup>C NMR (75 MHz, CDCl<sub>3</sub> TMS) δ 168.1, 135.8, 131.5, 130.0, 129.0, 127.9, 126.8, 121.0, 110.5, 48.0, 44.0, 37.9; MS (EI) *m/z* (%) 278 (15) [M]<sup>+</sup>, 233 (22), 208 (19), 160 (28), 132 (100). HRMS Calcd for C<sub>18</sub>H<sub>18</sub>N<sub>2</sub>O (M+1) 278.1419, Found 278.1423.

**1-Methyl-2-phenyl-3-(*Z*-phenylvinyl)imidazolidin-4-one **4a****: oil; <sup>1</sup>H NMR (300 MHz, CDCl<sub>3</sub> TMS) δ 6.79-7.39 (m, 10H), 6.29 (d, 2H, *J* = 9.5 Hz), 5.96 (d, 1H, *J* = 9.5 Hz), 4.89 (s, 1H), 3.70 (d, 1H, *J* = 15.0 Hz), 3.28 (d, 1H, *J* = 14.9 Hz) 2.24 (s, 3H); IR (KBr) ν 1719 (C=O), 1650 cm<sup>-1</sup>; <sup>13</sup>C NMR (75 MHz, CDCl<sub>3</sub> TMS) δ 170.1, 139.3, 136.1, 133.8, 129.6, 128.5, 127.4, 126.7, 125.6, 121.3, 114.6, 82.8, 56.6, 39.1; MS (EI) *m/z* (%) 278 (20) [M]<sup>+</sup>, 184 (15), 184 (15), 132 (100). HRMS Calcd for C<sub>18</sub>H<sub>18</sub>N<sub>2</sub>O (M+1) 278.1419,

Found 278.1422.

**3-(Z-4-Chlorophenylvinyl)-1-methyl-2-phenylimidazolidin-4-one 4b:** mp 102-103 °C; <sup>1</sup>H NMR (300 MHz, CDCl<sub>3</sub> TMS) δ 7.12-7.20 (m, 5H), 6.88 (d, 2H, *J* = 9.6 Hz), 6.80 (d, 2H, *J* = 9.0 Hz), 6.17 (d, 1H, *J* = 9.5 Hz), 5.82 (d, 1H, *J* = 9.7 Hz), 4.78 (s, 1H), 3.61 (d, 1H, *J* = 14.9 Hz), 3.20 (d, 1H, *J* = 14.9 Hz), 2.18 (s, 3H); IR (KBr) ν 1720 (C=O), 1650 cm<sup>-1</sup>; <sup>13</sup>C NMR (75 MHz, CDCl<sub>3</sub> TMS) δ 171.0, 136.1, 134.3, 133.1, 130.2, 129.1, 128.3, 128.2, 127.8, 121.7, 119.7, 83.6, 56.5, 38.9; MS (EI) *m/z* (%) 312 (15) [M]<sup>+</sup>, 314 (5) [M+2]<sup>+</sup>, 132 (100). HRMS Calcd for C<sub>18</sub>H<sub>17</sub>ClN<sub>2</sub>O (M+1) 312.1029, Found 312.1034.

**1-Methyl-2-phenyl-3-(Z)-(4-tolylvinyl)imidazolidin-4-one 4c:** oil; <sup>1</sup>H NMR (300 MHz, CDCl<sub>3</sub> TMS) δ 6.77-7.20 (m, 9H), 6.11 (d, 1H, *J* = 9.4 Hz), 5.89 (d, 1H, *J* = 9.4 Hz), 4.85 (s, 1H), 3.62 (d, 1H, *J* = 14.9 Hz), 3.22 (d, 1H, *J* = 14.8 Hz), 2.30 (s, 3H), 2.19 (s, 3H); IR (KBr) ν 1718 (C=O), 1650 cm<sup>-1</sup>; <sup>13</sup>C NMR (75 MHz, CDCl<sub>3</sub> TMS) δ 170.2, 139.3, 136.2, 133.8, 129.6, 128.5, 127.5, 126.7, 125.6, 121.3, 114.6, 82.8, 56.6, 39.1, 21.3; MS (EI) *m/z* (%) 292 (28) [M]<sup>+</sup>, 194 (3), 132 (100). HRMS Calcd for C<sub>19</sub>H<sub>20</sub>N<sub>2</sub>O (M+1) 292.1576, Found 292.1580.

**2-(4-Fluorophenyl)-1-methyl-3-(Z-phenylvinyl)imidazolidin-4-one 4d:** mp 131-132 °C; <sup>1</sup>H NMR (300 MHz, CDCl<sub>3</sub> TMS) δ 6.73-7.29 (m, 9H), 6.30 (d, 1H, *J* = 9.4 Hz), 5.97 (d, 1H, *J* = 9.4 Hz), 4.86 (s, 1H), 3.68 (d, 1H, *J* = 14.9 Hz), 3.32 (d, 1H, *J* = 14.9 Hz), 2.23 (s, 3H); IR (KBr) ν 1720 (C=O), 1650 cm<sup>-1</sup>; <sup>13</sup>C NMR (75 MHz, CDCl<sub>3</sub> TMS) δ 171.0, 165.0, 162.5, 135.8, 132.3, 129.7, 129.6, 129.0, 128.0, 127.4, 121.2, 120.8, 115.1, 114.8, 82.7, 56.4, 39.0; MS (EI) *m/z* (%) 296 (19) [M]<sup>+</sup>, 224 (3), 151 (20), 150 (100). HRMS Calcd for C<sub>18</sub>H<sub>17</sub>FN<sub>2</sub>O (M+1) 296.1325, Found 296.1324. Anal. Calcd for C<sub>18</sub>H<sub>17</sub>FN<sub>2</sub>O: C, 72.95; H, 5.78; N, 9.45. Found: C, 77.99; H, 5.79; N, 9.43.

**2-(4-Chlorophenyl)-1-methyl-3-(Z-phenylvinyl)imidazolidin-4-one 4e:** mp 104-105 °C; <sup>1</sup>H NMR (300 MHz, CDCl<sub>3</sub> TMS) δ 7.21-7.29 (m, 3H), 7.13 (d, 2H, *J* = 8.3 Hz), 6.99-7.02 (m, 2H), 6.70 (d, 2H, *J* = 8.4 Hz), 6.31 (d, 1H, *J* = 9.5 Hz), 5.97 (d, 1H, *J* = 9.5 Hz), 4.86 (s, 1H), 3.67 (d, 1H, *J* = 14.9 Hz), 3.26 (d, 1H, *J* = 14.9 Hz), 2.23 (s, 3H); IR (KBr) ν 1720 (C=O), 1649 cm<sup>-1</sup>; <sup>13</sup>C NMR (75 MHz, CDCl<sub>3</sub> TMS) δ 171.1, 135.7, 135.1, 134.8, 129.2, 129.0, 128.3, 128.0, 127.5, 121.1, 120.8, 82.7, 56.4, 39.0; MS (EI) *m/z* (%):

312 (18)  $[M]^+$ , 314 (6)  $[M+2]^+$ , 166 (100). HRMS Calcd for  $C_{18}H_{17}ClN_2O$  (M+1) 312.1029, Found 312.1032.

**1-Methyl-2-phenyl-3-(E-phenylvinyl)imidazolidin-4-one 6a:** oil;  $^1H$  NMR (300 MHz,  $CDCl_3$  TMS)  $\delta$  7.11-7.40 (m, 11H), 5.71 (d, 1H,  $J = 15.1$  Hz), 5.13 (s, 1H), 3.75 (d, 1H  $J = 15.2$  Hz), 3.32 (d, 1H,  $J = 15.2$  Hz), 2.38 (s, 3H); IR (KBr)  $\nu$  1718 (C=O), 1649  $cm^{-1}$ ;  $^{13}C$  NMR (75 MHz,  $CDCl_3$  TMS)  $\delta$  170.2, 136.8, 136.1, 129.4, 128.9, 128.5, 127.5, 126.8, 125.6, 121.2, 114.7, 83.0, 56.5, 39.2; MS (EI)  $m/z$  (%) 278 (20)  $[M]^+$ , 132 (100). HRMS Calcd. for  $C_{18}H_{18}N_2O$  (M+1) 278.1419, Found 278.1421.

**3-(E-3-Chlorophenylvinyl)-1-methyl-2-phenylimidazolidin-4-one 6b:** oil;  $^1H$  NMR (300 MHz,  $CDCl_3$  TMS)  $\delta$  7.12-7.38 (m, 10H), 5.71 (d, 1H,  $J = 15.2$  Hz), 5.07 (s, 1H), 3.72 (d, 1H  $J = 15.3$  Hz), 3.29 (d, 1H,  $J = 15.2$  Hz), 2.35 (s, 3H); IR (KBr)  $\nu$  1720 (C=O), 1650  $cm^{-1}$ ;  $^{13}C$  NMR (75 MHz,  $CDCl_3$  TMS)  $\delta$  170.0, 135.8, 135.0, 130.2, 129.7, 129.0, 128.6, 127.7, 127.0, 125.7, 121.1, 114.7, 82.2, 56.4, 39.2; MS (EI)  $m/z$  (%) 312 (18)  $[M]^+$ , 314 (6)  $[M+2]^+$ , 166 (100). HRMS Calcd for  $C_{18}H_{17}ClN_2O$  (M+1) 312.1029, Found 312.1033.

**1-Methyl-3-(E-phenylvinyl)-2-tolylimidazolidin-4-one 6c:** oil;  $^1H$  NMR (300 MHz,  $CDCl_3$  TMS)  $\delta$  7.10-7.33 (m, 10H), 5.75 (d, 1H,  $J = 15.1$  Hz), 5.08 (s, 1H), 3.72 (d, 1H,  $J = 15.1$  Hz), 3.29 (d, 1H,  $J = 15.1$  Hz), 2.35 (s, 3H), 2.34 (s, 3H); IR (KBr)  $\nu$  1719 (C=O), 1649  $cm^{-1}$ ;  $^{13}C$  NMR (75 MHz,  $CDCl_3$  TMS)  $\delta$  170.2, 139.3, 136.2, 133.8, 129.6, 128.5, 127.5, 126.7, 125.6, 121.3, 114.6, 82.8, 56.6, 39.1, 21.3; MS (EI)  $m/z$  (%) 292 (24)  $[M]^+$ , 171 (18), 146 (100). HRMS Calcd for  $C_{19}H_{20}N_2O$  (M+1) 292.1576, Found 292.1579.

**N-(Z-Phenylvinyl)-cis-1-methyl-3-phenylaziridine-2-carboxamide 8:** mp 67-68  $^{\circ}C$ ;  $^1H$  NMR (300 MHz,  $CDCl_3$  TMS)  $\delta$  8.43 (d, 1H,  $J = 11.0$  Hz), 6.60-7.41 (m, 11H), 5.57 (d, 1H,  $J = 9.6$  Hz), 3.00 (d, 1H,  $J = 7.0$  Hz), 2.61 (s, 3H), 2.47 (d, 1H,  $J = 7.0$  Hz); IR (KBr)  $\nu$  3364 (N-H), 1689 (C=O), 1654  $cm^{-1}$ ;  $^{13}C$  NMR (75 MHz,  $CDCl_3$  TMS)  $\delta$  166.1, 135.6, 134.8, 128.8, 128.3, 127.8, 127.7, 126.7, 120.5, 110.2, 49.2, 47.3, 46.4; MS (EI)  $m/z$  (%) 278 (27)  $[M]^+$ , 160 (80), 132 (100). HRMS Calcd for  $C_{18}H_{18}N_2O$  (M + 1) 278.1419, Found 278.1421. Anal. Calcd for  $C_{18}H_{18}N_2O$ : C, 77.67; H, 6.52; N, 10.06. Found: C,

77.32; H, 6.51; N, 10.10.

***N-(E-Phenylvinyl)-cis-1-methyl-3-phenylaziridine-2-carboxamide 9***: mp 175-176 °C; <sup>1</sup>H NMR (300 MHz, CDCl<sub>3</sub>, TMS) δ 7.96 (d, 1H *J* = 11.1 Hz), 7.09-7.33 (m, 11H), 5.90 (d, 1H, *J* = 14.6 Hz), 3.00 (d, 1H, *J* = 7.0 Hz), 2.64 (s, 3H), 2.48 (d, 1H, *J* = 7.1 Hz); IR (KBr) ν 3312 (N-H), 1671 (C=O), 1649 cm<sup>-1</sup>; <sup>13</sup>C NMR (75 MHz, CDCl<sub>3</sub>, TMS) δ 165.6, 135.5, 133.8, 131.4, 129.3, 128.8, 127.8, 126.9, 121.7, 120.5, 110.6, 48.4, 47.4, 46.2; MS (EI) *m/z* (%) 278 (28) [M]<sup>+</sup>, 233 (26) 208 (11), 178 (50), 160 (40), 132 (100). Anal. Calcd for C<sub>18</sub>H<sub>18</sub>N<sub>2</sub>O: C, 77.67; H, 6.52; N, 10.06. Found: C, 77.28; H, 6.51; N, 9.90.

## References.

- (1) Wang, J.-Y.; Wang, D.-X.; Pan, J.; Huang, Z.-T. Wang, M.-X. *J. Org. Chem.* **2007**, *72*, 9391.
- (2) Wenkert, D.; Ferguson, S. B.; Porter, B.; Qvarnstrom, A.; McPhail, A. T. *J. Org. Chem.* **1985**, *21*, 4114.
- (3) Ayi, A. I.; Guedj, R. *J. Chem. Soc., Perkin Trans. 1*, **1983**, 2045.
- (4) Yang, L.; Deng, G.; Wang, D.-X.; Huang, Z.-T.; Zhu, J.-P.; Wang, M.-X. *Org. Lett.* **2007**, *9*, 1387.
- (5) Yang, L.; Zheng, Q.-Y.; Wang, D.-X.; Huang, Z.-T.; Wang, M.-X. *Org. Lett.* **2008**, *10*, 2461 and references cited therein.
